# Supplementary material
Source: PubMed Central journal article supplement (PMC4095877)
Supplement: NIHMS599062-supplement-01.pdf [file NIHMS599062-supplement-01.pdf]

**Supplementary Table: Survey of tea varieties in the p53R assay.**

| Group       | Sample ID   | Maximal response              |                                                | Description                                                        |
|-------------|-------------|-------------------------------|------------------------------------------------|--------------------------------------------------------------------|
|             |             | (fold induction) <sup>a</sup> | Concentration at maximal response <sup>b</sup> |                                                                    |
| Group 1     | T-1 (G-I)   | 17                            | 0.08                                           | yinhou tea (T1, white tea) (Songyang, Zhejiang Province)           |
|             | T-3 (G-I)   | 23                            | 0.08                                           | longding tea (T3) (Kiahua, Zhejiang Province)                      |
|             | T-5 (G-I)   | 10                            | 0.08                                           | jiming gong tea (first grade) (T5) (Chengkou, Chongqing City)      |
|             | T-7 (G-I)   | 10                            | 0.2                                            | jiming gong tea (second grade) (T7) (Chengkou, Chongqing City)     |
| Group 2     | T-6 (G-II)  | 18                            | 0.08                                           | jiming gong tea (sixth grade) (T6) (Chengkou, Chongqing City)      |
|             | T-8 (G-II)  | 9                             | 0.2                                            | longjing tea (T8) (Hangzhou, Zhejiang)                             |
|             | T-9         | 15                            | 0.08                                           | omei green tea (T9) (Emei mountain, Sichuan Province)              |
|             | T-11        | 9                             | 0.08                                           | yuyun gong tea (second grade) (T11) (Chongqing city)               |
|             | T-13 (G-II) | 10                            | 0.04                                           | mingqian green tea (T13) (Sichuan Province)                        |
|             | T-21 (G-II) | 6                             | 0.04                                           | China zhu tea (T21)                                                |
|             | T-22 (G-II) | 10                            | 0.04                                           | Stash premium green tea (T22)                                      |
|             | T-35        | 22                            | 0.04                                           | maofeng tea (made in 2006) (T35) (Yellow mountain, Anhui Province) |
|             | T-57        | 16                            | 0.08                                           | Earl Grey green tea (T57)                                          |
|             | T-40        | 16                            | 0.2                                            | decaffeinated green tea 1 (T40)                                    |
| Group 3     | T-55        | 21                            | 0.08                                           | decaffeinated green tea 2 (T55)                                    |
|             | T-58        | 13                            | 0.08                                           | decaffeinated green tea 3 (T58)                                    |
|             | T-60        | 9                             | 0.08                                           | decaffeinated green tea 4 (T60)                                    |
|             | T-61        | 11                            | 0.08                                           | decaffeinated green tea 5 (T61)                                    |
|             | T-62        | 5                             | 0.8                                            | decaffeinated green tea 6 (T62)                                    |
|             | T-63        | 6                             | 0.2                                            | decaffeinated green tea 7 (T63)                                    |
|             | Group 4     | T-30 (G-IV)                   | 13                                             | 0.04                                                               |
| T-31 (G-IV) |             | 16                            | 0.04                                           | Foojoy China black tea (T31)                                       |
| T-41 (G-IV) |             | 17                            | 0.04                                           | Sri Lanka Irish breakfast tea (T41)                                |
| T-47 (G-IV) |             | 12                            | 0.04                                           | English breakfast tea (T47)                                        |

| Group   | Sample ID  | Maximal response (fold induction) <sup>a</sup> | Concentration at maximal response <sup>b</sup> | Description                                   |
|---------|------------|------------------------------------------------|------------------------------------------------|-----------------------------------------------|
| Group 5 | T-32 (G-V) | 17                                             | 0.04                                           | Yunnan tou tea (T32) (Yunnan Province)        |
|         | T-33 (G-V) | 11                                             | 0.08                                           | Yunnan citsebeeng tea (T33) (Yunnan Province) |
|         | WT-1       | 5                                              | 0.08                                           | White Tea 1                                   |
|         | WT-2       | 16                                             | 0.2                                            | White Tea 2                                   |
|         | WT-3       | 19                                             | 0.2                                            | White Tea 3                                   |
|         | WT-4       | 11                                             | 0.2                                            | White Tea 4                                   |
|         | GP-1       | 10                                             | 0.2                                            | Green Pu-erh Tea 1                            |
|         | GP-2       | 8                                              | 0.2                                            | Green Pu-erh Tea 2                            |
|         | GP-3       | 18                                             | 0.04                                           | Green Pu-erh Tea 3                            |
|         | GP-4       | 12                                             | 0.04                                           | Green Pu-erh Tea 4                            |
|         | GP-5       | 21                                             | 0.04                                           | Green Pu-erh Tea 5                            |
|         | GTE01      | 16                                             | 0.008                                          | Green Tea Extract 1                           |
|         | GTE02      | 18                                             | 0.02                                           | Green Tea Extract 2                           |
|         | GTE03      | 22                                             | 0.02                                           | Green Tea Extract 3                           |
|         | GTE04      | 16                                             | 0.08                                           | Green Tea Extract 4                           |
|         | GTE05      | 22                                             | 0.02                                           | Green Tea Extract 5                           |
|         | GTE06      | 17                                             | 0.02                                           | Green Tea Extract 6                           |
|         | GTE07      | 18                                             | 0.02                                           | Green Tea Extract 7                           |
|         | GTE08      | 14                                             | 0.04                                           | Green Tea Extract 8                           |
|         | GTE09      | 13                                             | 0.08                                           | Green Tea Extract 9                           |
|         | GTE10      | 22                                             | 0.08                                           | Green Tea Extract 10                          |

<sup>a</sup>This panel of teas was obtained as described in the Materials and Methods section.

<sup>b</sup>0.4g of tea sample was boiled in 10 ml of water for 1 min on a hot plate and filtered. This was arbitrarily designated 4x.
